# Supplementary material for: RBM15B-driven m6A hypomethylation destabilizes lncRNA SCAMP1 and trophoblast function in unexplained recurrent miscarriage
Source: Research Square preprint supplement (doi:10.21203/rs.3.rs-8695999/v1), 2026-02-05
Supplement: Supplementary file 2 [file 9693fd5cff0aeaa317817c6a.docx]

**Table S1． Basic patient information for clinical samples**

| Indicator | NC  （n=20，mean±SD） | URSA  （n=20，mean±SD） | P value |
| --- | --- | --- | --- |
| Age(years)  Gestational（days）  Number of pregnancies  Number of deliveries  Number of previous miscarriages | 29.2±6.96  50.9±6.32  1.95±1.24  0.52±0.81  0.10±0.3 | 33±4.36  47.2±8.58  2.62±0.67  0.48±0.6  2.05±0.22 | 0.0533  0.12  0.0366  0.8303  ＜0.0001 |

**Abbreviation: NC: normal control, URSA: unexplained recurrent spontaneous abortion**

**Table S2. List of primers used for RT-qPCR.**

| Gene | Primer sequences（5’-3’） |
| --- | --- |
| RBM15B  SCAMP1  IGF2BP1  IGF2BP2  IGF2BP3  LIN28B  U2sn  S14 | Forward： CAGTACCTCCAGTCAGCACTAAG  Reverse： CACAAACATGACGCTGGGAAAGA  Forward： ACAAAACTGTCCAGACCGCA  Reverse： GCCCATGCACAAGTGAACAG  Forward：TCGTTGCAAGACCTTACCCTTTA  Reverse ：TGGCAGCCACATCATTCTCATAG  Forward ：AAAGAGGCAGATGAGACCAAACT  Reverse ：TGATGGTTCTTTCCGGGTTGTAT  Forward ：ACACCTGATGAGAATGACCAAGT  Reverse ：CTTCTGTTGTTGGTGCTGCTTTA  Forward ：GTAACAGGACCTGGTGGGAG  Reverse ：TGTCTTCCCTGAGAACTCGC  Forward ：CATCGCTTCTCGGCCTTTTG  Reverse : TGGAGGTACTGCAATACCAGG  Forward ：GGCAGACCGAGATGAATCCTC  Reverse: CAGGTCCAGGGGTCTTGGTCC |
| β-Actin | Forward： CCTTCCTGGGCATGGAGTC  Reverse ：TGATCTTCATTGTGCTGGGTG |

**Table S3 RBM15B and SCAMP1 interference sequence**

| Gene | Forward（5’→3’） | Reverse（5’→3’） |
| --- | --- | --- |
| si-RBM15B-142 | GCAACCUCUUCAUUGGUAATT | UUACCAAUGAAGAGGUUGCTT |
| si- RBM15B -297 | CCGUGUGGCCUACGUGAAUTT | AUUCACGUAGGCCACACGGTT |
| si- RBM15B -672 | GGAAUGGGCUUCUGGUGUUTT | AACACCAGAAGCCCAUUCCTT |
| si-SCAMP1-260 | CCCAAUACACAACCAGCAATT | UUGCUGGUUGUGUAUUGGGTT |
| si-SCAMP1-565 | CCAUGCAGUAACACUGUUUTT | AAACAGUGUUACUGCAUGGTT |
| si-SCAMP1-986 | GCCCAACAGGAGUUUGCAATT | UUGCAAACUCCUGUUGGGCTT |

**Table S4**  **Gene Symbols of 89 mRNAs most significantly bound by IGF2BP2**

| DSCC1 | STXBP6 | ENSA | HACD3 | CBX6 |
| --- | --- | --- | --- | --- |
| ID4 | SNX25 | REEP3 | RTN3 | PTGER4 |
| IGF2BP3 | GFM2 | ST7L | NUP50 | SRPRA |
| DUSP22 | SUB1 | OSTM1 | PMM1 | NXT2 |
| CUL4B | NNT | JKAMP | COL5A2 | CDADC1 |
| TMED4 | NCKAP1 | COPS2 | RAD23A | MARCKS |
| FNDC3A | BOK | RTN4 | DBT | B4GALT6 |
| CALR | GPC4 | GPM6B | NEURL1B | BNIP2 |
| ALDH9A1 | UST | UBE2QL1 | SLC35F6 | COMMD4 |
| ARL8B | MTHFD2L | RRAGD | CENPH | LIN28B |
| MSL3 | PHF10 | C19orf12 | EPB41L4B | RMDN1 |
| MED28 | HAUS6 | AP1S2 | IGF2BP1 | G3BP2 |
| METTL25 | SLC44A1 | ABCG2 | APLP2 | LETM2 |
| STK38L | UBE4A | ACER3 | GOPC | APPL1 |
| RIOK3 | PARVA | RCN1 | COL4A1 | LNPEP |
| F11R | MZT1 | TFDP2 | PRR11 | SAR1A |
| RAB5A | NXN | PLEKHB2 | CCT5 | COPS8 |
| SCP2 | GABARAPL2 | RPL31 | DPYSL2 |  |
